# Supplementary material for: Adsorption of toxic acidic dye from aqueous solution onto diethylenetriamine functionalized magnetic glycidyl methacrylate-N,N′-methylenebisacrylamide
Source: Royal Society of Chemistry journal article supplement (doi:10.1039/c5ra24035b), 2015-12-23
Supplement: c5ra24035b1.pdf [file c5ra24035b1.pdf]

## Supplementary Material

### Adsorption of toxic acidic dye from aqueous solution onto diethylenetriamine functionalized magnetic glycidyl methacrylate - N,N' methylenebisacrylamide

**K.Z. Elwakeel<sup>\*a</sup>, A.A. El-Bindary<sup>b</sup>, A.Z. El-Sonbati<sup>b</sup>, A.R. Hawas<sup>b</sup>**

<sup>a</sup> Environmental Science Department, Faculty of Science, Port-Said University, Port-Said, Egypt

<sup>b</sup>Chemistry Department, faculty of Science, Damietta University, Damietta 34517, Egypt

---

\*Corresponding author: Fax: +20(0)1061694332.  
E-mail address: [Khalid\\_elwakeel@yahoo.com](mailto:Khalid_elwakeel@yahoo.com) (K.Z. Elwakeel).

**Table SM1:** Kinetics models and their linear forms

| Kinetic model           | Non-Linear form                         | Linear form                                                         | Plot                       | Author                        |
|-------------------------|-----------------------------------------|---------------------------------------------------------------------|----------------------------|-------------------------------|
| Pseudo-First order      | $q_t = q_e [1 - e^{-k_1 t}]$            | $\log (q_e - q_t) = \log q_e - \left(\frac{k_1}{2.303}\right)t$     | $\log (q_e - q_t)$ vs. $t$ | (Lagergren, 1898) [16]        |
| Pseudo-Second order     | $q_t = \frac{k_2 t}{1 + k_2 q_e t}$     | $\frac{t}{q_t} = \frac{1}{k_2 q_e^2} + \left(\frac{1}{q_e}\right)t$ | $(t/q_t)$ vs. $t$          | (Ho and McKay, 1999) [17]     |
| Intraparticle diffusion | -                                       | $q_t = k_i t^{0.5} + X$                                             | $q_t$ vs. $t^{0.5}$        | (Weber and Morris, 1963) [18] |
| Elovich equation        | $\frac{dq_t}{dt} = \alpha e^{-\beta q}$ | $q_t = \frac{1}{\beta} \ln \alpha \beta + \frac{1}{\beta} \ln t$    | $q_t$ vs. $\ln t$          | (Zeldowitsch, 1934) [19]      |

**Table SM2:** Sorption isotherms and their linear forms

| Isotherm             | Non-Linear form                             | Linear form                                                                       | Plot                          | Author                         |
|----------------------|---------------------------------------------|-----------------------------------------------------------------------------------|-------------------------------|--------------------------------|
| Langmuir             | $q_e = \frac{q_{m,L} K_L C_e}{1 + K_L C_e}$ | $\frac{C_e}{q_e} = \frac{C_e}{q_{m,L}} + \frac{1}{K_L q_{m,L}}$                   | $\frac{C_e}{q_e}$ vs. $C_e$   | (Langmuir, 1918) [21]          |
| Freundlich           | $q_e = K_F C_e^{1/n}$                       | $\ln q_e = \ln K_f + \frac{1}{n} \ln C_e$                                         | $\ln q_e$ vs. $\ln C_e$       | (Freundlich, 1906) [22]        |
| Dubinin–Radushkevich | $q_e = Q_{DR} e^{-K_{DR} \varepsilon^2}$    | $\ln q_e = \ln Q_{DR} - K_{DR} \varepsilon^2$                                     | $\ln q_e$ vs. $\varepsilon^2$ | (Dubinin et al., 1947) [23]    |
| Temkin               | $q_e = \frac{RT}{b_T} [\ln(A_T C_e)]$       | $q_e = \left(\frac{RT}{b_T}\right) \ln A_T + \left(\frac{RT}{b_T}\right) \ln C_e$ | $q_e$ vs. $\ln C_e$           | (Temkin and Pyzhev, 1940) [24] |

## Figures captions

**Figure SM1:** FT-IR spectrum of the MGMA-DETA adsorbent.

**Figure SM2:** Powder X-ray diffraction (XRD) pattern of MGMA-DETA particles (and tentative assignment of peaks).

**Figure SM3:** Vibrating sample magnetometer curves for MGMA and MGMA-DETA sorbent.

**Figure SM4:** TGA analysis of the MGMA-DETA adsorbent.

**Figure SM5:** Modeling of uptake kinetics with: (a) PFORE, (b) PSORE.

**Figure SM6:** Modeling of uptake kinetics with (a) simplified model of resistance to intraparticle diffusion (Morris and Weber equation), (b) Elovich equation.

**Figure SM7:** Linearized plots for sorption isotherms: (a) Langmuir equation, (b) Freundlich equation.

**Figure SM8:** Linearized plots for sorption isotherms: (a) Dubinin–Radushkevich equation, Temkin model.

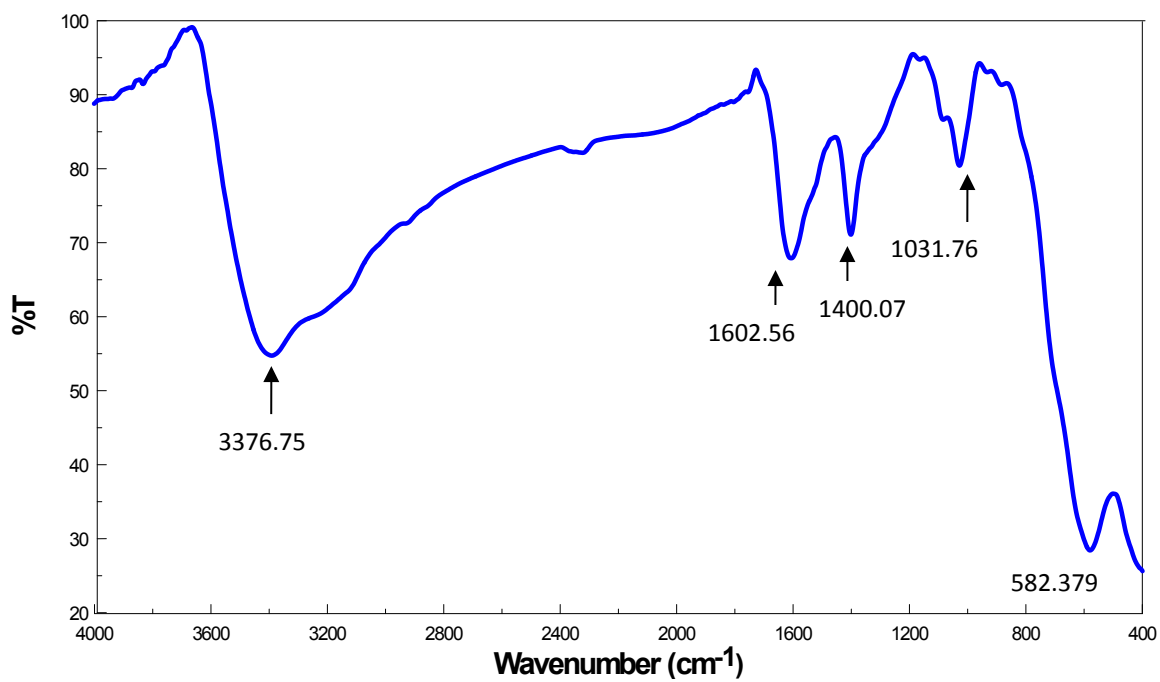

Figure SM1

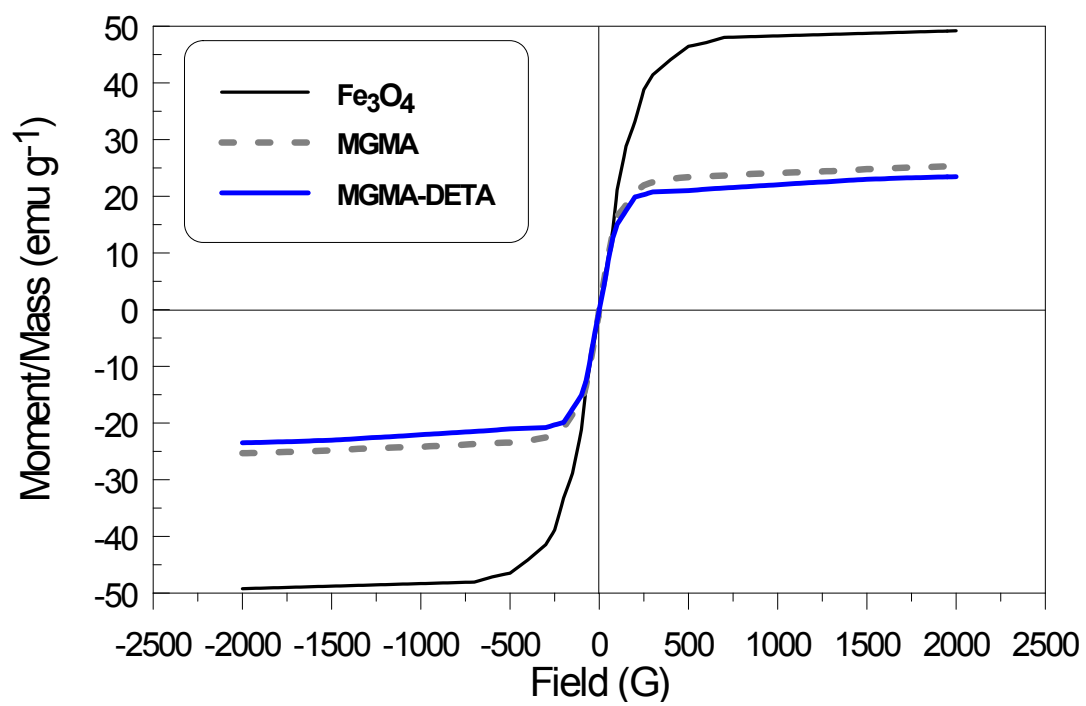

Figure SM2

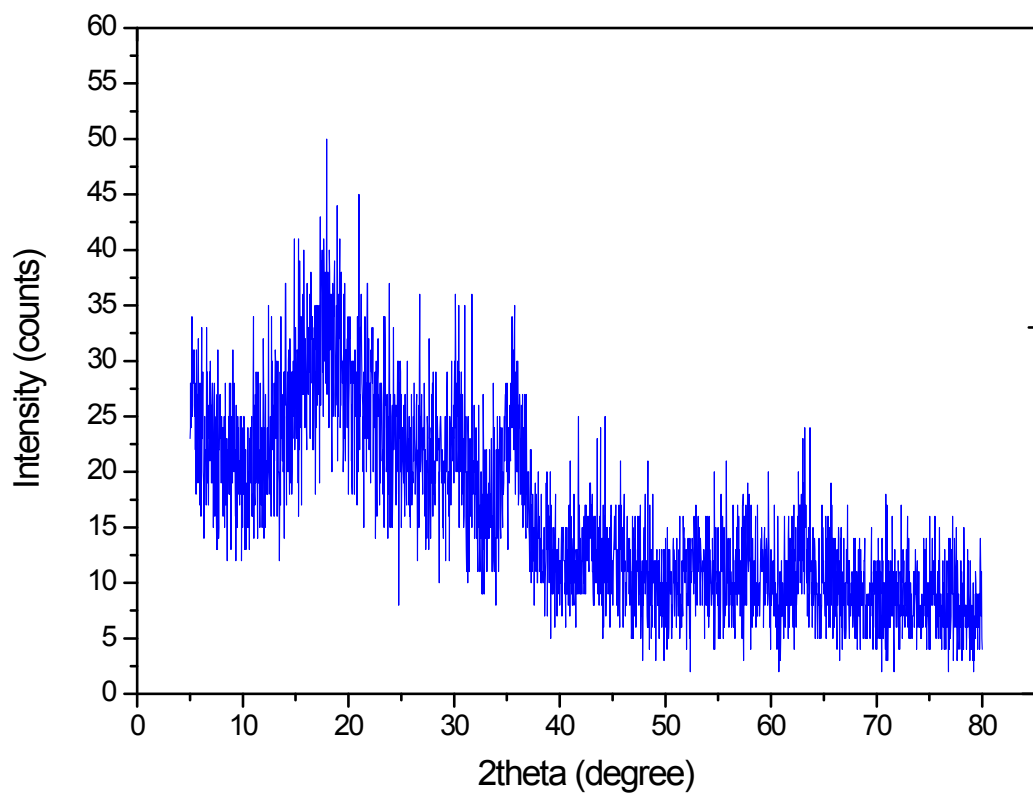

**Figure SM3**

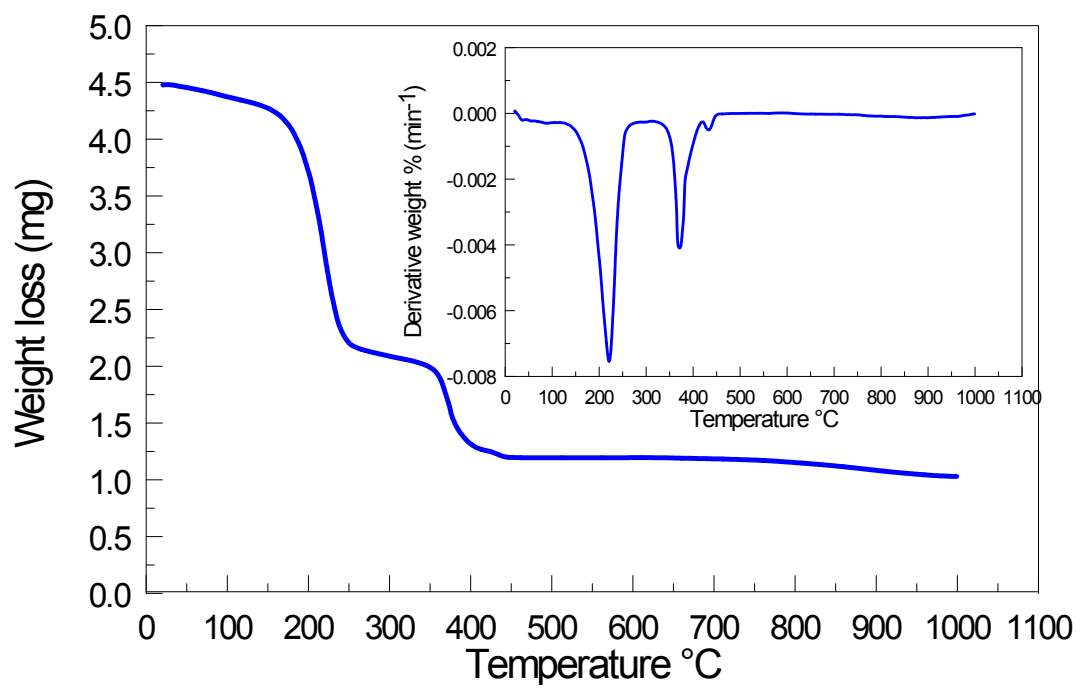

**Figure SM4**



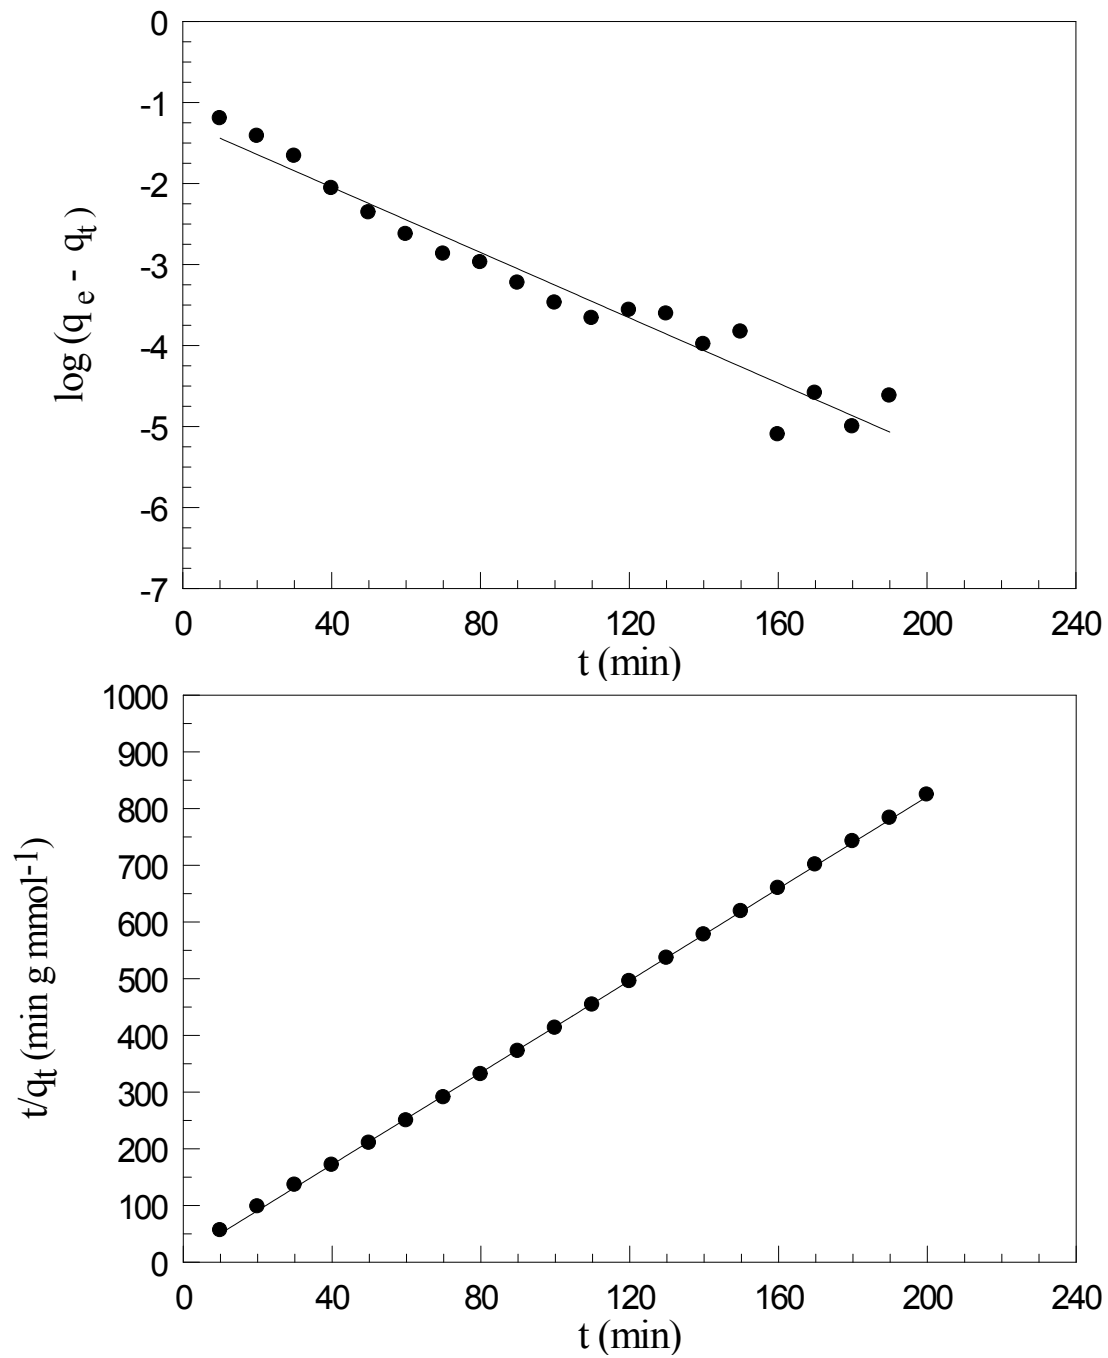

**Figure SM5**

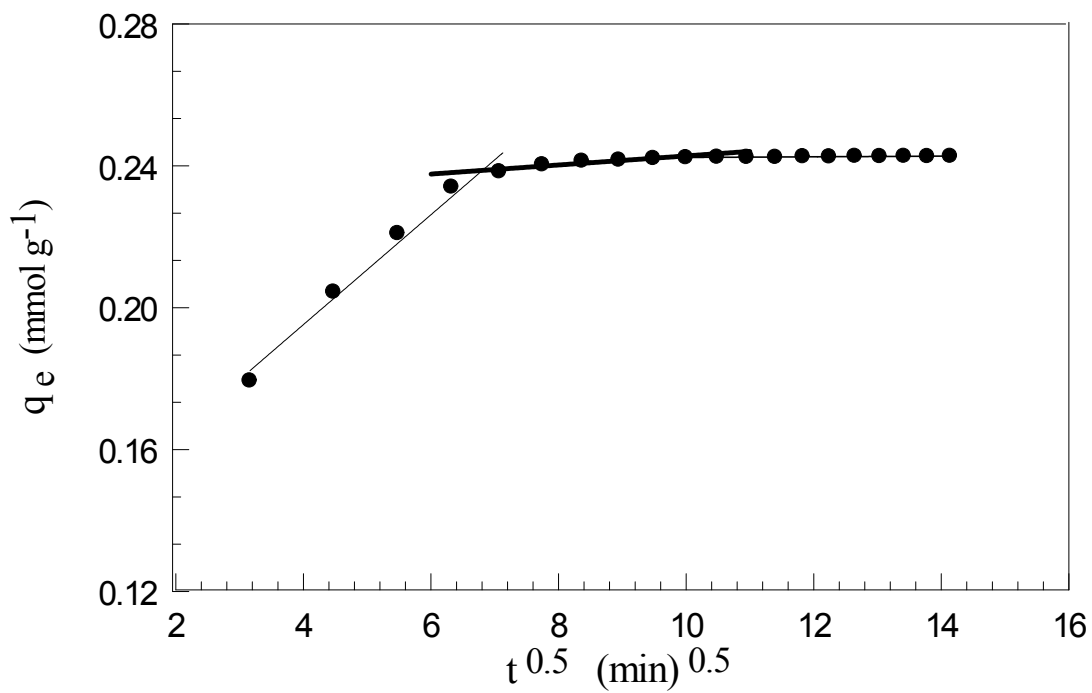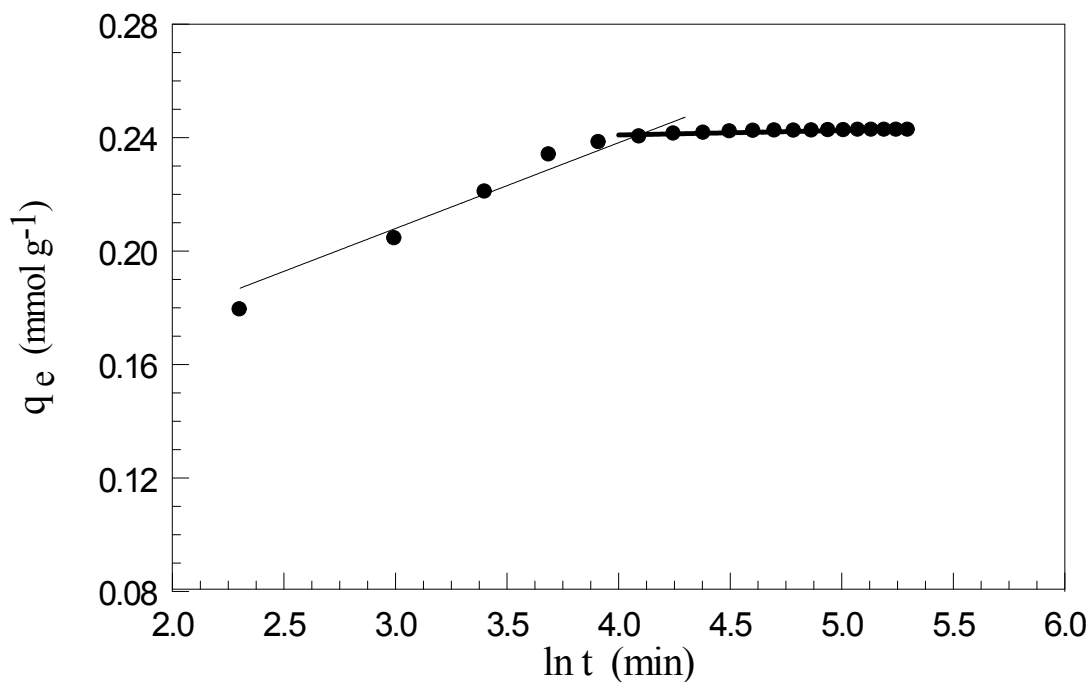

**Figure SM6**

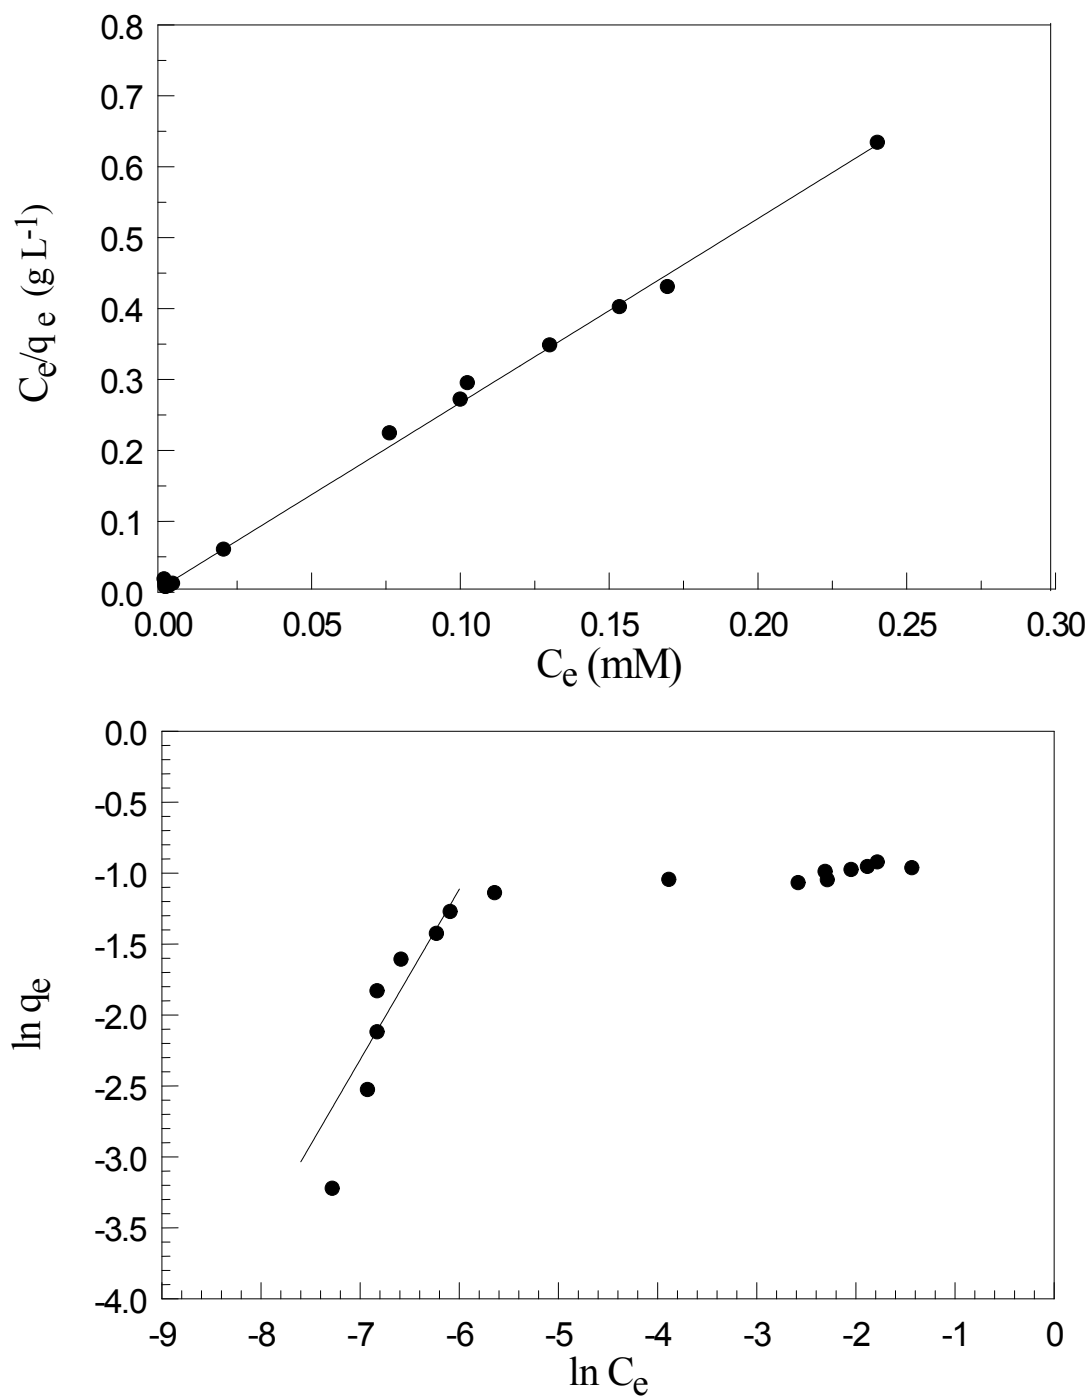

Figure SM7

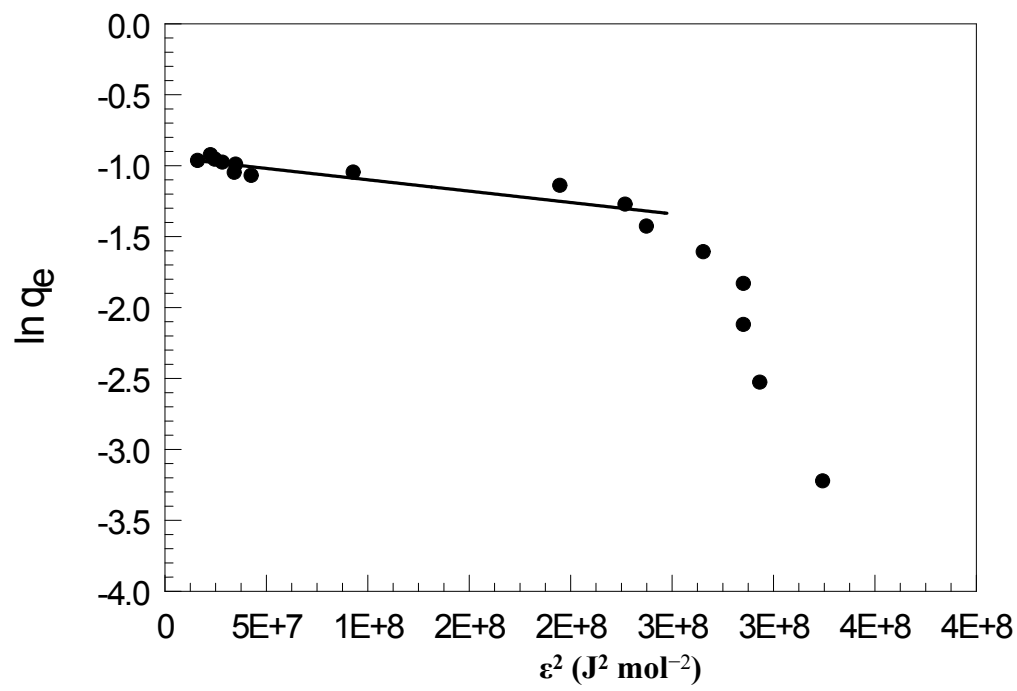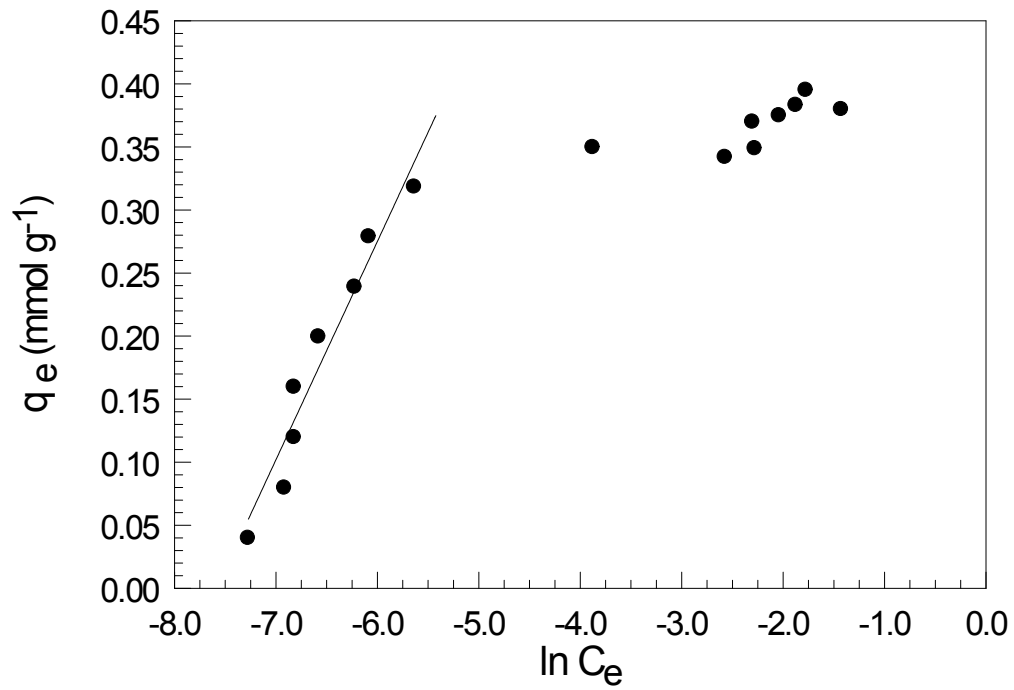

**Figure SM8**
